# Supplementary material for: Inhibition of IκB Kinase at 24 Hours After Acute Kidney Injury Improves Recovery of Renal Function and Attenuates Fibrosis
Source: PubMed Central journal article supplement — J Am Heart Assoc. 2017 Jul 3;6(7):e005092. doi: 10.1161/JAHA.116.005092 (PMC5586267; doi:10.1161/jaha.116.005092), 2017-07-03
Supplement: JAH3-6-e005092-s001.pdf [file JAH3-6-e005092-s001.pdf]

# **Supplemental Material**

**Table S1.** The dose response of IKK16 (at 24 h into reperfusion) in a rat model of 30 min of renal ischaemia followed by 48 h of reperfusion (IRI) on markers of renal, glomerular and tubular function.

| <b>Group</b>                     | <b>Serum Urea</b><br>mmoL/L | <b>Serum Creatinine</b><br>μmol/L | <b>Estimated Creatinine Clearance</b><br>ml/min/100g bw | <b>Fractional Excretion of Sodium</b><br>% |
|----------------------------------|-----------------------------|-----------------------------------|---------------------------------------------------------|--------------------------------------------|
| <b>Sham + Vehicle</b>            | 5.50 ± 0.26 *               | 41.91 ± 1.71 *                    | 0.40 ± 0.03 *                                           | 0.9 ± 0.13 *                               |
| <b>IRI + Vehicle</b>             | 34.22 ± 2.53                | 198.58 ± 21.63                    | 0.09 ± 0.01                                             | 4.13 ± 0.57                                |
| <b>IRI + IKK16<br/>0.1 mg/kg</b> | 31.93 ± 13.28               | 172.02 ± 60.66                    | 0.08 ± 0.03                                             | 4.77 ± 0.82                                |
| <b>IRI + IKK16<br/>0.3 mg/kg</b> | 27.37 ± 3.11                | 183.14 ± 28.82                    | 0.10 ± 0.03                                             | 4.81 ± 1.38                                |
| <b>IRI + IKK16<br/>1 mg/kg</b>   | 16.41 ± 1.32 *              | 80.99 ± 6.47 *                    | 0.25 ± 0.03*                                            | 1.42 ± 0.15 *                              |

Serum urea, serum creatinine and estimated creatinine clearance were measured as indicators of glomerular dysfunction, and fractional excretion of sodium as indicator of tubular dysfunction at 48 h of reperfusion. Sham + Vehicle: n=11, 10 % DMSO (1 ml/kg i.v.) 24 h into reperfusion; IRI + Vehicle: n=11, 10 % DMSO (1 ml/kg i.v.) h into reperfusion; IRI + IKK16 0.1 mg/kg: n=5; 0.1 mg/kg IKK-16 (1 ml/kg i.v.) 24 h into reperfusion; IRI + IKK16 0.3 mg/kg: n=7, 0.3 mg/kg IKK-16 (1 ml/kg i.v.) 24 h into reperfusion; IRI + IKK16 1 mg/kg: n=9, 1 mg/kg IKK-16 (1 ml/kg i.v.) 24 h into reperfusion. All animals culled at 48 h post reperfusion. Data are presented as mean ± SEM of n observations, ★P<0.05 vs IRI + Vehicle.

**Figure S1.** The effect of the late administration of IKK16 (24 h post reperfusion) on serum KIM-1.

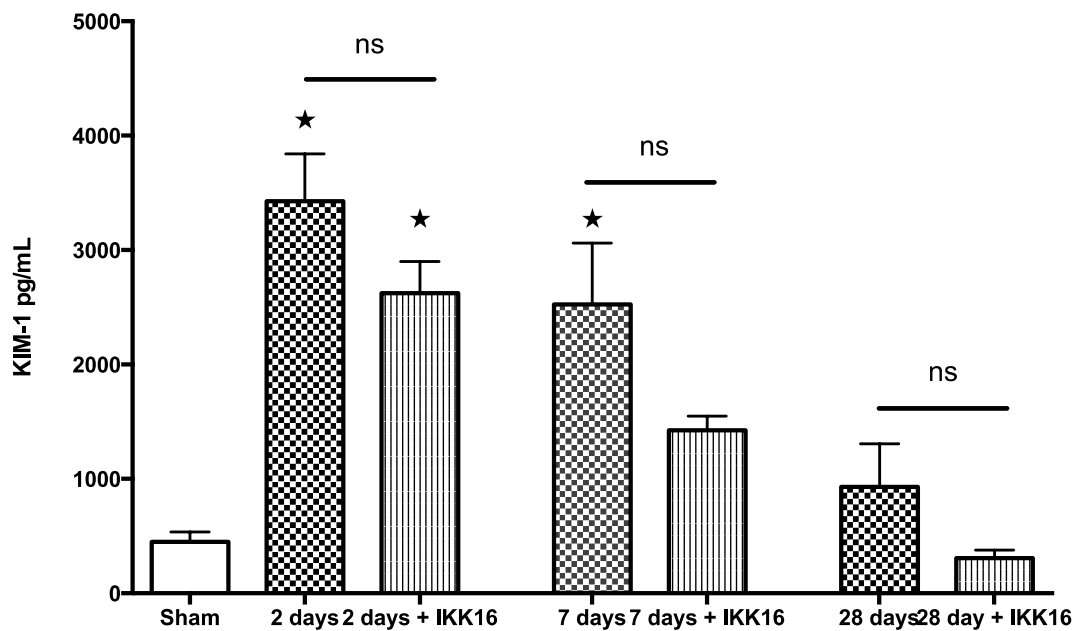

n=5 for all groups

Sham + vehicle: n=5; 2 day post reperfusion: n=5; 7 days post reperfusion: n=5; 28 days post reperfusion: n=5; 1mg/kg IKK16 24 h post reperfusion + 2 day reperfusion: n=5; 1mg/kg IKK16 24 h post reperfusion + 7 day reperfusion: n=5; 1mg/kg IKK16 24 h post reperfusion + 28 day reperfusion: n=5. Data are presented as mean  $\pm$  SEM of n observations, \*P<0.05 vs. Sham.
